# Supplementary material for: The Status of Wildlife Damage Compensation in China
Source: MDPI journal article supplement (doi:10.3390/ani14020292), 2024-01-17
Supplement: s1 [file s1]

## Chinese References (including Supplementary Material S1,2)

9. 何馨成, 吴兆录. 我国野生动物肇事的现状及其管理研究进展[J]. 四川动物, 2010, (1): 141-143.
11. 宋志勇, 罗杰斯, 刘婷娇. 景洪市野生动物肇事及补偿情况调查研究[J]. 林业调查规划, 2019, 44(3): 125-129.
12. 汪家军. 关于建立钱江源国家公园野生动物肇事补偿机制的路径探索[J]. 林业建设, 2021, (2): 9-11.
22. 王洪杰, 张希武, 岳仲明. 中华人民共和国野生动物保护法释义[M]. 中国民主法治出版社, 北京, 中国, 2016.
28. 苏凯文, 任婕, 黄元, 杨洁, 温亚利. 自然保护区人兽冲突管理现状、挑战及建议[J]. 野生动物学报, 2022, 43 (1): 259-265.
29. 蒋志刚. 动物行为原理与物种保护方法[M]. 北京: 科学出版社, 2004, 327-339.
33. 蔡炳城, 李青文, 郭立新, 等. 野生动物肇事损害赔偿调查[J]. 野生动物, 2011, 32(4): 228-232.
46. 原艺, 赵荣. 我国野生动物致害补偿机制与野生动物肇事公众责任保险制度比较[J]. 世界林业研究, 2022, 第 35 卷(2): 123-128.
48. 王文霞, 周冉. 海南省陆生野生动物致害调查报告. 中国林业科学研究院林业科技信息研究所, 北京, 中国, 2022.
49. 王文霞. 天津市陆生野生动物致害调查报告. 中国林业科学研究院林业科技信息研究所, 北京, 中国, 2022.
50. 龙耀. 野生动物致损与经济赔偿的诸多选项[J]. 改革, 2018, (2): 146-158
51. 刘渊. 野生动物致害的生态保护补偿法律制度研究[J]. 现代商贸工业, 2017, 第 38 卷 (29): 131-132.
52. 王小芮. 我国野生动物致害补偿制度研究[D]. 甘肃政法大学, 2021.
54. 王悦. 群鸟北归, 万只豆雁嫩江“加餐”.  
<https://heilongjiang.dbw.cn/system/2016/04/15/057178784.shtml>
55. 谢文芳, 宋军平, 苏海萍, 岩丙, 王巧燕. 西双版纳国家级自然保护区野生动物肇事补偿现状及缓解对策[J]. 林业调查规划, 2020, 45(2): 182-186.
56. 梁曾飞, 李志国, 彭泰来, 邢元军, 胡觉, 冯强. 西藏野生动物肇事补偿实施现状、存在问题以及对策[J]. 中南林业调查规划, 2020, 39(3): 36-41.

57. 岳巍. 鸟! 别吃鱼~唉~吃吧. <https://news.sina.com.cn/o/2008-03-30/071013656676s.shtml>
64. 甘燕君, 李玲. 西双版纳州野生动物肇事补偿现状及补偿机制初探[J]. 绿色科技, 2018, (12): 38-41.
65. 孙丽, 李伟东, 艾平, 郑振河, 马琼芳, 吴景才, 孔维尧. 吉林省野生动物损害特点及补偿工作评价[J]. 野生动物学报, 2015, (1): 48-53.
66. 周鸿升, 唐景全, 郭保香, 王希群, 董金花, 李凯, 侯森林. 我国重点保护野生动物肇事问题、特点及其解决途径[J]. 北京林业大学学报·社会科学版, 2010, (2): 37-41.
67. 李雯雯. 西双版纳人象冲突风险评估研究[D]. 云南财经大学, 2017.
72. 王一晴, 戚新悦, 高煜芳. 人与野生动物冲突: 人与自然共生的挑战[J]. 科学, 2019, 第71卷(5): 1-4, 69-70.
73. 云南省人民政府. 1988. 云南省重点保护陆生野生动物造成人身财产损害赔偿办法. [https://www.yn.gov.cn/zwgk/zfxxgkpt/gkptzcwj/gz/202112/t20211222\\_231977.html](https://www.yn.gov.cn/zwgk/zfxxgkpt/gkptzcwj/gz/202112/t20211222_231977.html). 2023 0808 (1998.9.19)
74. 陕西省人民政府. 2004. 陕西省重点保护陆生野生动物造成人身财产损害赔偿办法. [http://www.shaanxi.gov.cn/zfxxgk/fdzdgknr/zcwj/nszfgz/202208/t20220804\\_2233088.html](http://www.shaanxi.gov.cn/zfxxgk/fdzdgknr/zcwj/nszfgz/202208/t20220804_2233088.html) (2004.11.4)
75. 吉林省人民政府. 2007. 吉林省重点保护陆生野生动物造成人身财产损害赔偿办法. [http://xxgk.jl.gov.cn/szf/gkml/201812/t20181205\\_5349567.html](http://xxgk.jl.gov.cn/szf/gkml/201812/t20181205_5349567.html)
76. 北京市人民政府. 2009. 北京市重点保护陆生野生动物造成损失补偿办法. [https://www.beijing.gov.cn/zhengce/zhengcefagui/201905/t20190529\\_82101.html](https://www.beijing.gov.cn/zhengce/zhengcefagui/201905/t20190529_82101.html)
77. 甘肃省人民政府. 2010. 甘肃省陆生野生保护动物造成人身伤害和财产损失补偿办法. <http://www.gansu.gov.cn/art/c103795/c104045/c104050/201011/206342.shtml>
78. 西藏自治区人民政府. 2010. 西藏自治区陆生野生动物造成公民人身伤害或者财产损失补偿办法. [http://www.xizang.gov.cn/zwgk/xxfb/fgwj/201902/t20190223\\_61885.html](http://www.xizang.gov.cn/zwgk/xxfb/fgwj/201902/t20190223_61885.html)
79. 青海省人民政府. 2012. 青海省重点保护陆生野生动物造成人身财产损失补偿办法. [http://sft.qinghai.gov.cn/pub/qhsfxzw/qhszfgzk/szfgz/202102/t20210203\\_56033.html](http://sft.qinghai.gov.cn/pub/qhsfxzw/qhszfgzk/szfgz/202102/t20210203_56033.html)
80. 安徽省人民政府. 2011. 安徽省陆生野生动物造成人身伤害和财产损失补偿办法. <https://www.ah.gov.cn/public/1681/554081141.html>

81. 贵州省林业局.贵州省陆生野生动物造成人身财产损害赔偿办法.  
[http://lyj.guizhou.gov.cn/zfxxgk/fdzdgknr/zcwj\\_5620825/ywwj\\_5620827/202109/t20210914\\_70393501.html](http://lyj.guizhou.gov.cn/zfxxgk/fdzdgknr/zcwj_5620825/ywwj_5620827/202109/t20210914_70393501.html)
82. 黑龙江省人民政府. 2021. 黑龙江省陆生野生动物造成人身伤害和财产损失补偿办法. [https://www.hlj.gov.cn/hlj/c107910/202112/c00\\_30633877.shtml](https://www.hlj.gov.cn/hlj/c107910/202112/c00_30633877.shtml)
83. 山西省人民政府. 2023. 山西省陆生野生动物造成人身与财产损害赔偿办法.  
[http://www.shanxi.gov.cn/zfxxgk/zfxxgkzl/fdzdgknr/lzyj/szfl/202302/t20230203\\_7914604\\_gzk.shtml](http://www.shanxi.gov.cn/zfxxgk/zfxxgkzl/fdzdgknr/lzyj/szfl/202302/t20230203_7914604_gzk.shtml)
84. 内蒙古自治区人民政府. 2023. 内蒙古自治区陆生野生动物致害补偿管理办法.  
[https://www.nmg.gov.cn/zwgk/zfxxgk/zfxxgkml/gzxzgfxwj/xzgfwj/202301/t20230119\\_2217604.html?dzb=true](https://www.nmg.gov.cn/zwgk/zfxxgk/zfxxgkml/gzxzgfxwj/xzgfwj/202301/t20230119_2217604.html?dzb=true)
85. 四川省人民政府. 2023. 四川省陆生野生动物致害补偿办法.
86. 辽宁省人民政府. 2023. 辽宁省陆生野生动物造成人身伤害和财产损失补偿办法.  
<https://www.ln.gov.cn/web/zwgkx/zfwj/szfbgtwj/2023n/2023031408431910540/index.shtml> (2023.2.23)
88. 李建. 北京市密云区野生动物肇事及补偿情况分析[J]. 绿化与生活, 2015, (12): 15-19.
89. 王方辰.当心被毒蛇咬伤—北京毒蛇伤人事件逐年上升[J]. 科技潮, 2001, (8): 35-37.
90. 侯鸣, 王松, 张涛, 孙晓宇, 董宝森. 黑龙江野生东北虎进村追踪:不到半年出现数次, “大王”为何频频“下山”? [http://www.xinhuanet.com/2021-04/24/c\\_1127370571.htm](http://www.xinhuanet.com/2021-04/24/c_1127370571.htm)
91. 雪灵谷. 黑熊下山, 在大街上狂奔, 跑进一个小胡同后, 就消失在茫茫夜色中.  
<https://www.163.com/dy/article/HHL7CM3A0524I0P1.html>
92. 梁书斌. 黑龙江村民遭野猪袭击受伤. <http://news.sina.com.cn/c/2014-11-15/110831149269.shtml>
93. 于淑鸿, 姚爱群, 吴德士. 五万只北飞大雁黑龙江畔歇脚.  
<https://heihe.dbw.cn/system/2020/04/15/058394959.shtml>.
94. 吉林省林业宣传中心. 珲春一只野生少年东北豹进入村院造成 30 多只鸡死亡, 一只狗受伤.  
[http://www.isenlin.cn/sf\\_65986208CF2C46519EE9B02BB7549EA0\\_209\\_4AC6F4AD498.html](http://www.isenlin.cn/sf_65986208CF2C46519EE9B02BB7549EA0_209_4AC6F4AD498.html) (2018.9.28)
95. 李祎斌, 陈楚, 刘丙万.吉林省珲春地区人与野生动物冲突现状与防控调查[J]. 野生动物学报, 2018, 第 39 卷(4): 962-965.

96. 刘美斯, 廖庆义, 白林壮, 田书荣. 壶瓶山国家级自然保护区野生动物肇事现状及  
管理建议[J]. 野生动物学报, 2018, 39(1): 177-180.
98. 黄兴华. 湖南洞庭湖麋鹿迷途与人争食 菜农受损爱恨交加.  
<http://news.sohu.com/20121024/n355587194.shtml>
99. 段涵敏, 梁辉. 湖南暴雨逼毒蛇出洞, 至少 8 人被咬伤.  
[http://hunan.ifeng.com/news/fghx/detail\\_2013\\_05/17/809594\\_0.shtml](http://hunan.ifeng.com/news/fghx/detail_2013_05/17/809594_0.shtml)  
<https://www.sc.gov.cn/10462/zfwjts/2023/1/18/8152f96b3e4c4295b7ffdbc77b261dc8.shtml>
100. 万玛加. 青海拟定陆生野生动物“肇事”赔偿试点方案.  
[https://www.360kuai.com/pc/9be037ec463da3f98?cota=3&kuai\\_so=1&sign=360\\_57c3bbd1&refer\\_scene=so\\_1](https://www.360kuai.com/pc/9be037ec463da3f98?cota=3&kuai_so=1&sign=360_57c3bbd1&refer_scene=so_1)
101. 赵凇松. 青海实施野生动物伤人赔偿办法. <https://www.chinanews.com/sh/2014/03-17/5960733.shtml>
102. 范茹歌. 德令哈市森林公安局处置野生动物肇事事事件.  
[https://www.sohu.com/a/429809176\\_120207624](https://www.sohu.com/a/429809176_120207624)
103. 汤中和, 郭占泽, 郭占显, 郭万春. 青海玉树市高原鼠兔危害情况调查[J]. 四川畜牧  
兽医, 2022, 49(12): 20-21, 24.
104. 魏学红, 杨富裕, 孙磊. 高原鼠兔对西藏高寒草地的危害及防治[J]. 四川草原, 2006,  
(5): 41-42, 45.
105. 王永顺. 高原鼠兔的危害现状调查与防治建议[J]. 兽医导刊, 2020, (18): 56.
106. 新华社. 西藏野生动物“肇事”政府补偿. <http://news.sina.com.cn/s/2005-09-07/09416882374s.shtml>
107. 刘洪明. 西藏 9 年间落实野生动物肇事补偿资金 4 亿多元.  
<http://news.sina.com.cn/c/2015-02-15/155031524552.shtml>
108. 张雷, 杨树赛, 王成. 新疆福海县野兔泛滥成灾, 部分庄稼被毁.  
<http://news.sina.com.cn/c/2008-06-11/083615721450.shtml>
109. 新疆生产建设兵团林业局. 新疆生产建设兵团开展重点保护野生动物造成职工财产  
损害专项补助. <http://finance.sina.com.cn/nongye/nygd/20150205/091921482453.shtml>
110. 赵敏. 南宁 54 岁村妇被野猪突然袭击, 全身多处被严重咬伤.  
<https://baijiahao.baidu.com/s?id=1619171270459265100>
111. 新华网. 广西: 村民放羊被大蟒蛇追逐 山羊被活活缠死.  
<http://news.sohu.com/20140923/n404567802.shtml>

112. 谌利民,熊跃武,马曲波,等. 四川唐家河自然保护区周边林缘社区野生动物冲突与管理对策研究[J].四川动物, 2006, 25(4):781-783.
114. 秦蒙琳, 史效轩. 云南野生动物肇事 5 年损失超 2.4 亿.  
<https://www.kunming.cn/news/c/2013-08-29/3387295.shtml>
115. 刘俊霞. 内蒙古草原生态环保面临新难题: 野生动物致害 损失谁来补.  
<http://inews.nmgnews.com.cn/system/2013/01/05/010894354.shtml>
116. 李永祥.南滚河自然保护区野生动物肇事理赔现状调查[J]. 云南林业, 2020, (1): 80-85.
117. 彭典,陈鹏. 做好防范! 贵州常见这些野生动物肇事.  
[https://www.360kuai.com/pc/940e834b49b265ae6?cota=3&kuai\\_so=1&tj\\_url=so\\_vip&sign=360\\_57c3bbd1&refer\\_scene=so\\_1](https://www.360kuai.com/pc/940e834b49b265ae6?cota=3&kuai_so=1&tj_url=so_vip&sign=360_57c3bbd1&refer_scene=so_1)
119. 新华网. 山西部分山区时发野生动物害农事件.  
<http://news.sohu.com/84/00/news207910084.shtml>
120. 张建军.野生动物对群众生产生活造成损害情况的研究——以山西阳城蟒河猕猴国家级自然保护区为例[J].中国林业经济, 2019, (3): 120-123.
122. 王斌, 李雯雯, 许利剑, 陆英杰, 郭敏. 西双版纳自然保护区勐养子保护区亚洲象肇事特点及损失情况分析[J].林业调查规划, 2017, 42(1): 118-123, 129.
123. 郭贤明,王兰新. 西双版纳亚洲象食物源基地建设的思考[J]. 林业建设. 2019,6,30-33.
124. 达瓦次仁, 弓进梅, 拉巴卓嘎.改革开放以来西藏自然保护区建设与成就[J].西藏研究, 2018, (5): 133-140.
125. 人民日报. 吉林森林覆盖率提高到 45.2%. <https://finance.sina.cn/2023-02-08/detail-imyeyaiy3164690.d.html>
126. 甄春延.善待人类的朋友: 吉林省保护野生动物工作综述[J].吉林人大, 2013, (1): 5-7.
128. 侯一蕾,温亚利.野生动物肇事对社区农户的影响及补偿问题分析——以秦岭自然保护区群为例[J]. 林业经济问题, 2012, 32(5): 388-391.
130. 唐勤.西双版纳人象冲突与缓解对策[D]. 昆明理工大学, 2007
131. 云南省林业和草原局. 云南野生动物公众责任保险试点工作成效显著.  
[http://lcj.yn.gov.cn/html/2012/mainnews\\_1031/30552.html](http://lcj.yn.gov.cn/html/2012/mainnews_1031/30552.html)
