# Supplementary material for: The Status of Wildlife Damage Compensation in China
Source: MDPI journal article supplement (doi:10.3390/ani14020292), 2024-01-17
Supplement: s1 [file s1]

**Table S1:** Species list of nuisance species, their IUCN conservation status, and the type of damage they cause, reported by 19 Chinese provinces, autonomous regions, and municipalities in the seven biogeographic regions of China.

| Biogeographic region (Sun et al., 2020) | Provinces, Autonomous regions & Municipalities | Animal class | English name          | Latin name                        | Conservation Status (IUCN) | Type of damage                             | References |
|-----------------------------------------|------------------------------------------------|--------------|-----------------------|-----------------------------------|----------------------------|--------------------------------------------|------------|
| North (temperate grassland)             | Beijing                                        | mammal       | tolai hare            | <i>Lepus tolai</i>                | LC                         | crop damage                                | 88         |
|                                         | Beijing                                        | mammal       | European badger       | <i>Meles meles</i>                | LC                         | crop damage                                | 88         |
|                                         | Beijing                                        | mammal       | wild boar             | <i>Sus scrofa</i>                 | LC                         | crop damage                                | 88         |
|                                         | Beijing                                        | mammal       | leopard cat           | <i>Prionailurus bengalensis</i>   | LC                         | crop damage                                | 31         |
|                                         | Beijing                                        | mammal       | rhesus macaque        | <i>Macaca mulatta</i>             | LC                         | crop damage                                | 31         |
|                                         | Beijing                                        | bird         | Magpie                | <i>Pica pica</i>                  | LC                         | crop, fruit damage                         | 88         |
|                                         | Beijing                                        | bird         | Eurasian tree sparrow | <i>Passer montanus</i>            | LC                         | crop, fruit damage                         | 88         |
|                                         | Beijing                                        | bird         | Azure-winged magpie   | <i>Cyanopica cyana</i>            | LC                         | crop, fruit damage                         | 88         |
|                                         | Beijing                                        | bird         | Eurasian eagle-owl    | <i>Bubo bubo</i>                  | LC                         | crop, fruit, poultry damage                | 88         |
|                                         | Beijing                                        | reptile      | short-tailed pitviper | <i>Gloydius brevicaudus</i>       | LC                         | human casualties                           | 89         |
| North (temperate grassland)             | Tianjin                                        | mammal       | tolai hare            | <i>Lepus tolai</i>                | LC                         | crop damage                                | 49         |
|                                         | Tianjin                                        | mammal       | Siberian chipmunk     | <i>Tamias sibiricus</i>           | LC                         | crop, fruit damage                         | 49         |
|                                         | Tianjin                                        | mammal       | leopard cat           | <i>Prionailurus bengalensis</i>   | LC                         | poultry damage                             | 49         |
|                                         | Tianjin                                        | bird         | Oriental white stork  | <i>Ciconia boyciana</i>           | EN                         | fish, shrimp damage                        | 49         |
|                                         | Tianjin                                        | bird         | Great egret           | <i>Ardea alba</i>                 | LC                         | fish, shrimp damage                        | 49         |
|                                         | Tianjin                                        | bird         | Little egret          | <i>Egretta garzetta</i>           | LC                         | fish, shrimp damage                        | 49         |
|                                         | Tianjin                                        | bird         | Grey crane            | <i>Grus grus</i>                  | LC                         | fish, shrimp damage                        | 49         |
|                                         | Tianjin                                        | bird         | White spoonbill       | <i>Platalea leucorodia</i>        | LC                         | fish, shrimp damage                        | 49         |
|                                         | Tianjin                                        | bird         | Whooper swan          | <i>Cygnus cygnus</i>              | LC                         | fish, shrimp damage                        | 49         |
|                                         | Tianjin                                        | bird         | Black-headed gull     | <i>Chroicocephalus ridibundus</i> | LC                         | fish, shrimp damage                        | 49         |
|                                         | Tianjin                                        | bird         | Cormorant             | <i>Phalacrocorax carbo</i>        | LC                         | fish, shrimp damage                        | 49         |
|                                         | Tianjin                                        | bird         | Relict gull           | <i>Ichthyaeetus relictus</i>      | VU                         | fish, shrimp damage                        | 49         |
|                                         | Tianjin                                        | bird         | Mallard               | <i>Anas platyrhynchos</i>         | LC                         | fish, shrimp damage                        | 49         |
|                                         | Tianjin                                        | bird         | Purple heron          | <i>Ardea purpurea</i>             | LC                         | fish, shrimp damage                        | 49         |
|                                         | Tianjin                                        | bird         | Magpie                | <i>Pica pica</i>                  | LC                         | crop, fruit damage                         | 49         |
|                                         | Tianjin                                        | bird         | Eurasian tree sparrow | <i>Passer montanus</i>            | LC                         | crop, fruit damage                         | 49         |
| Northeast (coniferous forest)           | Heilongjiang                                   | mammal       | Siberian tiger        | <i>Panthera tigris altaica</i>    | EN                         | livestock damage                           | 90         |
|                                         | Heilongjiang                                   | mammal       | Asiatic black bear    | <i>Ursus thibetanus</i>           | VU                         | human, livestock, fruit, apiculture damage | 91         |
|                                         | Heilongjiang                                   | mammal       | wild boar             | <i>Sus scrofa</i>                 | LC                         | crop, forest damage                        | 92         |
|                                         | Heilongjiang                                   | bird         | Swan goose            | <i>Anser cygnoides</i>            | EN                         | crop damage                                | 93         |
|                                         | Heilongjiang                                   | bird         | Taiga bean goose      | <i>Anser fabalis</i>              | LC                         | crop damage                                | 54         |
|                                         | Heilongjiang                                   | bird         | Oriental white stork  | <i>Ciconia boyciana</i>           | EN                         | crop, fish damage                          | 93         |
|                                         | Heilongjiang                                   | bird         | Grey crane            | <i>Grus grus</i>                  | LC                         | crop, fish damage                          | 93         |
|                                         | Heilongjiang                                   | bird         | Grey heron            | <i>Ardea cinerea</i>              | LC                         | crop, fish damage                          | 93         |

|                                            |              |         |                        |                                    |    |                                           |            |
|--------------------------------------------|--------------|---------|------------------------|------------------------------------|----|-------------------------------------------|------------|
|                                            | Heilongjiang | bird    | Mallard                | <i>Anas platyrhynchos</i>          |    | crop, fish damage                         | 93         |
| Northeast<br>(coniferous forest)           | Jilin        | mammal  | Siberian tiger         | <i>Panthera tigris altaica</i>     | EN | livestock damage                          | 33, 65     |
|                                            | Jilin        | mammal  | Amur leopard           | <i>Panthera pardus orientalis</i>  | VU | livestock damage                          | 65, 94     |
|                                            | Jilin        | mammal  | Asiatic black bear     | <i>Ursus thibetanus</i>            | VU | human, apiculture damage                  | 33, 65     |
|                                            | Jilin        | mammal  | Eurasian lynx          | <i>Lynx lynx</i>                   | LC | livestock damage                          | 65         |
|                                            | Jilin        | mammal  | leopard cat            | <i>Prionailurus bengalensis</i>    | LC | livestock damage                          | 65         |
|                                            | Jilin        | mammal  | wolf                   | <i>Canis lupus</i>                 | LC | livestock damage                          | 65         |
|                                            | Jilin        | mammal  | Siberian weasel        | <i>Mustela sibirica</i>            | LC | livestock damage                          | 65         |
|                                            | Jilin        | mammal  | yellow-throated marten | <i>Martes flavigula</i>            | LC | livestock damage                          | 65         |
|                                            | Jilin        | mammal  | badger                 | <i>Meles meles</i>                 | LC | crop damage                               | 65         |
|                                            | Jilin        | mammal  | sika deer              | <i>Cervus nippon</i>               | LC | fruit, seedling damage                    | 95         |
|                                            | Jilin        | mammal  | Siberian roe deer      | <i>Capreolus pygargus</i>          | LC | fruit, seedling damage                    | 95         |
|                                            | Jilin        | mammal  | red deer               | <i>Cervus elaphus</i>              | LC | crop damage                               | 65         |
|                                            | Jilin        | mammal  | wild boar              | <i>Sus scrofa</i>                  | LC | crop damage                               | 33, 65, 95 |
|                                            | Jilin        | bird    | birds of prey          | <i>Falconiformes /Strigiformes</i> | -  | human, livestock damage                   | 65         |
|                                            | Jilin        | bird    | geese and ducks        | <i>Anseriformes</i>                | -  | crop damage                               | 65         |
| Central<br>(deciduous broad-leafed forest) | Hunan        | mammal  | leopard cat            | <i>Prionailurus bengalensis</i>    | LC | Livestock damage                          | 96         |
|                                            | Hunan        | mammal  | small Indian civet     | <i>Viverricula indica</i>          | LC | poultry damage                            | 96         |
|                                            | Hunan        | mammal  | hog badger             | <i>Arctonyx collaris</i>           | VU | crop, livestock, poultry damage           | 96         |
|                                            | Hunan        | mammal  | Asiatic black bear     | <i>Ursus thibetanus</i>            | VU | crop damage                               | 96         |
|                                            | Hunan        | mammal  | red-hipped squirrel    | <i>Dremomys pyrrhomerus</i>        | LC | crop damage                               | 96         |
|                                            | Hunan        | mammal  | Chinese hare           | <i>Lepus sinensis</i>              | LC | crop damage                               | 96         |
|                                            | Hunan        | mammal  | Tibetan macaque        | <i>Macaca thibetana</i>            | NT | crop, human casualties                    | 97         |
|                                            | Hunan        | mammal  | rhesus macaque         | <i>Macaca mulatta</i>              | LC | crop, human casualties                    | 96         |
|                                            | Hunan        | mammal  | tufted deer            | <i>Elaphodus cephalophus</i>       | NT | crop damage                               | 96         |
|                                            | Hunan        | mammal  | Reeves's muntjac       | <i>Muntiacus reevesi</i>           | LC | crop damage                               | 96         |
|                                            | Hunan        | mammal  | Chinese goral          | <i>Naemorhedus griseus</i>         | VU | crop damage                               | 96         |
|                                            | Hunan        | mammal  | wild boar              | <i>Sus scrofa</i>                  | LC | crop damage                               | 96         |
|                                            | Hunan        | mammal  | Pere David's deer      | <i>Elaphurus davidianus</i>        | EW | crop damage                               | 98         |
|                                            | Hunan        | reptile | many-banded krait      | <i>Bungarus multicinctus</i>       | LC | human casualties                          | 99         |
|                                            | Hunan        | reptile | banded krait           | <i>Bungarus fasciatus</i>          | LC | human casualties                          | 99         |
|                                            | Hunan        | reptile | hundred-pace viper     | <i>Deinagkistrodon acutus</i>      | VU | human casualties                          | 99         |
|                                            | Hunan        | reptile | master viper           | <i>Trimeresurus stejnegeri</i>     | LC | human casualties                          | 99         |
|                                            | Hunan        | reptile | Chinese cobra          | <i>Naja atra</i>                   | VU | human casualties                          | 99         |
|                                            | Hunan        | reptile | king cobra             | <i>Ophiophagus hannah</i>          | VU | human casualties                          | 99         |
|                                            | Hainan       | mammal  | wild boar              | <i>Sus scrofa</i>                  | LC | crop, poultry, property, human casualties | 48         |
|                                            | Hainan       | mammal  | rhesus macaque         | <i>Macaca mulatta</i>              | LC | poultry, human casualties                 | 48         |
|                                            | Hainan       | mammal  | Hainan Eld's deer      | <i>Cervus eldii hainanus</i>       | EN | crop, human casualties                    | 48         |

|                              |         |         |                       |                                  |    |                                        |             |
|------------------------------|---------|---------|-----------------------|----------------------------------|----|----------------------------------------|-------------|
| South (tropical forest)      | Hainan  | mammal  | red-hipped squirrel   | <i>Dremomys pyrrhomerus</i>      | LC | crop damage                            | 48          |
|                              | Hainan  | mammal  | red fox               | <i>Vulpes vulpes</i>             | LC | poultry damage                         | 48          |
|                              | Hainan  | mammal  | Yellow-bellied weasel | <i>Mustela kathiah</i>           | LC | crop, poultry damage                   | 48          |
|                              | Hainan  | mammal  | leopard cat           | <i>Prionailurus bengalensis</i>  | LC | crop, poultry damage                   | 48          |
|                              | Hainan  | mammal  | vesper bat            | <i>Vespertilionidae sp.</i>      | -  | fruit, crop damage                     | 48          |
|                              | Hainan  | mammal  | rat                   | <i>Muroidea sp.</i>              | -  | fruit, crop, poultry, human casualties | 48          |
|                              | Hainan  | bird    | Eurasian tree sparrow | <i>Passer montanus</i>           | LC | crop damage                            | 48          |
|                              | Hainan  | bird    | Crested myna          | <i>Acridotheres cristatellus</i> | LC | crop damage                            | 48          |
|                              | Hainan  | bird    | eagle species         | <i>Aquila sp.</i>                | -  | fruit, poultry damage                  | 48          |
|                              | Hainan  | bird    | Little egret          | <i>Egretta garzetta</i>          | LC | crop, fish, shrimp damage              | 48          |
|                              | Hainan  | bird    | Red-billed starling   | <i>Sturnus sericeus</i>          | LC | crop, fruit damage                     | 48          |
|                              | Hainan  | bird    | Whiskered tern        | <i>Chlidonias hybrida</i>        | LC | crop, fish, shrimp damage              | 48          |
|                              | Hainan  | bird    | Turtle dove           | <i>Streptopelia turtur</i>       | VU | crop damage                            | 48          |
|                              | Hainan  | bird    | Chinese pond heron    | <i>Ardeola bacchus</i>           | LC | crop, fish, shrimp damage              | 48          |
|                              | Hainan  | bird    | owl species           | <i>Strigiformes sp.</i>          | -  | poultry                                | 48          |
|                              | Hainan  | bird    | Lesser coucal         | <i>Centropus bengalensis</i>     | LC | crop, fruit damage                     | 48          |
|                              | Hainan  | bird    | Chinese francolin     | <i>Francolinus pintadeanus</i>   | LC | crop damage                            | 48          |
|                              | Hainan  | bird    | Siberian crane        | <i>Grus leucogeranus</i>         | CR | crop, fish, shrimp                     | 48          |
|                              | Hainan  | reptile | Burmese python        | <i>Python bivittatus</i>         | VU | poultry, livestock, human casualties   | 48          |
| Southwest (alpine grassland) | Qinghai | mammal  | Asiatic black bear    | <i>Ursus thibetanus</i>          | VU | livestock, human casualties            | 100         |
|                              | Qinghai | mammal  | brown bear            | <i>Ursus arctos</i>              | LC | livestock, human, house damage         | 101, 102    |
|                              | Qinghai | mammal  | wolf                  | <i>Canis lupus</i>               | LC | livestock damage                       | 100         |
|                              | Qinghai | mammal  | snow leopard          | <i>Panthera uncia</i>            | VU | livestock damage                       | 100         |
|                              | Qinghai | mammal  | plateau pika          | <i>Ochotona curzoniae</i>        | LC | pasture damage                         | 103         |
|                              | Qinghai | mammal  | wild yak              | <i>Bos mutus</i>                 | VU | livestock, human, house damage         | 101         |
| Southwest (alpine grassland) | Xizang  | mammal  | Himalayan marmots     | <i>Marmota himalayana</i>        | LC | pasture damage                         | 56, 104     |
|                              | Xizang  | mammal  | plateau pikas         | <i>Ochotona curzoniae</i>        | LC | pasture damage                         | 56, 104,105 |
|                              | Xizang  | mammal  | Tibetan macaque       | <i>Macaca thibetana</i>          | NT | crop damage                            | 56          |
|                              | Xizang  | mammal  | wolf                  | <i>Canis lupus</i>               | LC | livestock damage                       | 56,106, 107 |
|                              | Xizang  | mammal  | red fox               | <i>Vulpes vulpes</i>             | LC | livestock damage                       | 56          |
|                              | Xizang  | mammal  | Eurasian lynx         | <i>Lynx lynx</i>                 | LC | livestock damage                       | 56          |
|                              | Xizang  | mammal  | snow leopard          | <i>Panthera uncia</i>            | VU | livestock damage                       | 56,106,107  |
|                              | Xizang  | mammal  | Asiatic black bear    | <i>Ursus thibetanus</i>          | VU | house, livestock, crop damage          | 56,106,107  |
|                              | Xizang  | mammal  | brown bear            | <i>Ursus arctos</i>              | LC | human, house, livestock, crop damage   | 56,106,107  |
|                              | Xizang  | mammal  | white-lipped deer     | <i>Przewalskium albirostris</i>  | VU | crop damage                            | 56,107      |

|                                     |          |         |                            |                                    |    |                                            |         |
|-------------------------------------|----------|---------|----------------------------|------------------------------------|----|--------------------------------------------|---------|
|                                     | Xizang   | mammal  | wild yak                   | <i>Bos mutus</i>                   | VU | livestock, human, house, pasture damage    | 56,106  |
|                                     | Xizang   | mammal  | kiang                      | <i>Equus kiang</i>                 | LC | pasture damage                             | 56      |
|                                     | Xizang   | mammal  | bharal or blue sheep       | <i>Pseudois nayaur</i>             | LC | house, crop damage                         | 106     |
| Northwest (desert)                  | Xinjiang | mammal  | dhole or red dog           | <i>Cuon alpinus</i>                | EN | livestock damage                           | 37      |
|                                     | Xinjiang | mammal  | desert hare                | <i>Lepus tibetanus</i>             | LC | crop damage, seedling damage               | 108     |
|                                     | Xinjiang | mammal  | wolf                       | <i>Canis lupus</i>                 | LC | livestock, poultry damage                  | 109     |
|                                     | Xinjiang | mammal  | brown bear                 | <i>Ursus arctos</i>                | LC | livestock, property damage                 | 109     |
|                                     | Xinjiang | mammal  | snow leopard               | <i>Panthera uncia</i>              | VU | livestock, property damage                 | 109     |
|                                     | Xinjiang | mammal  | wild boar                  | <i>Sus scrofa</i>                  | LC | crop, livestock, pasture, human casualties | 109     |
| South (tropical forest)             | Guangxi  | mammal  | rhesus macaque             | <i>Macaca mulatta</i>              | LC | crop, human casualties                     | 32      |
|                                     | Guangxi  | mammal  | wild boar                  | <i>Sus scrofa</i>                  | LC | crop, human casualties                     | 110     |
|                                     | Guangxi  | reptile | Burmese python             | <i>Python bivittatus</i>           | VU | livestock, poultry damage                  | 111     |
| South (tropical & deciduous forest) | Sichuan  | mammal  | Asiatic black bear         | <i>Ursus thibetanus</i>            | VU | crop, livestock damage                     | 24,112  |
|                                     | Sichuan  | mammal  | leopard ssp.               | <i>Panthera pardus ssp.</i>        | VU | livestock damage                           | 24,112  |
|                                     | Sichuan  | mammal  | leopard cat                | <i>Prionailurus bengalensis</i>    | LC | livestock, poultry damage                  | 24,112  |
|                                     | Sichuan  | mammal  | civet cat                  | <i>Paguma larvata</i>              | LC | crop, fruit damage                         | 24,112  |
|                                     | Sichuan  | mammal  | Siberian weasel            | <i>Mustela sibirica</i>            | LC | Livestock & poultry damage, crop damage    | 24,112  |
|                                     | Sichuan  | mammal  | hog badger                 | <i>Arctonyx collaris</i>           | VU | crop damage                                | 24,112  |
|                                     | Sichuan  | mammal  | Tibetan macaque            | <i>Macaca thibetana</i>            | NT | crop damage                                | 24,112  |
|                                     | Sichuan  | mammal  | Chinese porcupine          | <i>Hystrix brachyura hodgsoni</i>  | LC | crop damage                                | 24,112  |
|                                     | Sichuan  | mammal  | Swinhoe's striped squirrel | <i>Tamias swinhoi</i>              | LC | crop damage                                | 112     |
|                                     | Sichuan  | mammal  | tolai hare                 | <i>Lepus tolai</i>                 | LC | crop damage                                | 112     |
|                                     | Sichuan  | mammal  | Sichuan takin              | <i>Budorcas taxicolor tibetana</i> | VU | crop, forest damage                        | 112     |
|                                     | Sichuan  | mammal  | northern red muntjac       | <i>Muntiacus vaginalis</i>         | LC | crop damage                                | 112     |
|                                     | Sichuan  | mammal  | wild boar                  | <i>Sus scrofa</i>                  | LC | crop damage                                | 24, 112 |
|                                     | Sichuan  | mammal  | wolf                       | <i>Canis lupus</i>                 | LC | livestock damage                           | 24      |
|                                     | Sichuan  | mammal  | dhole or red dog           | <i>Cuon alpinus</i>                | EN | livestock damage                           | 24      |
|                                     | Sichuan  | mammal  | South Asian sambar         | <i>Rusa unicolor</i>               | VU | crop damage                                | 24      |
|                                     | Sichuan  | mammal  | giant panda                | <i>Ailuropoda melanoleuca</i>      | VU | crop damage                                | 24      |
|                                     | Sichuan  | bird    | Jungle crow                | <i>Corvus macrorhynchos</i>        | LC | crop, fruit damage                         | 112     |
| South (tropical forest)             | Yunnan   | mammal  | Asiatic black bear         | <i>Ursus thibetanus</i>            | VU | crop, property, human casualties           | 55      |
|                                     | Yunnan   | mammal  | wolf                       | <i>Canis lupus</i>                 | LC | livestock damage                           | 113     |
|                                     | Yunnan   | mammal  | dhole or red dog           | <i>Cuon alpinus</i>                | EN | livestock damage                           | 113     |
|                                     | Yunnan   | mammal  | rhesus macaque             | <i>Macaca mulatta</i>              | LC | crop damage                                | 36      |
|                                     | Yunnan   | mammal  | South Asian sambar         | <i>Rusa unicolor</i>               | VU | crop damage                                | 36      |
|                                     | Yunnan   | mammal  | Chinese porcupine          | <i>Hystrix brachyura hodgsoni</i>  | LC | crop damage                                | 114     |

|                                                  |                |        |                              |                                    |    |                                                |     |
|--------------------------------------------------|----------------|--------|------------------------------|------------------------------------|----|------------------------------------------------|-----|
|                                                  | Yunnan         | mammal | bamboo rat                   | <i>Rhizomys sp.</i>                | -  | crop damage                                    | 114 |
|                                                  | Yunnan         | mammal | squirrel species             | <i>Sciuridae sp.</i>               | -  | crop damage                                    | 114 |
|                                                  | Yunnan         | mammal | grey langur                  | <i>Trachypithecus phayrei</i>      | EN | crop damage                                    | 114 |
|                                                  | Yunnan         | mammal | western black crested gibbon | <i>Nomascus concolor</i>           | CR | crop damage                                    | 114 |
|                                                  | Yunnan         | mammal | Asian elephant               | <i>Elephas maximus</i>             | EN | crop, property, human casualties               | 55  |
|                                                  | Yunnan         | mammal | wild boar                    | <i>Sus scrofa</i>                  | LC | crop, property, human casualties               | 55  |
|                                                  | Yunnan         | mammal | gaur                         | <i>Bos gaurus</i>                  | VU | crop damage                                    | 55  |
|                                                  | Yunnan         | mammal | Indochinese leopard          | <i>Panthera pardus delacouri</i>   | VU | livestock and poultry damage                   | 116 |
|                                                  | Yunnan         | bird   | Grey-headed parakeet         | <i>Psittacula finschii</i>         | NT | crop damage                                    | 36  |
|                                                  | Yunnan         | bird   | Eurasian tree sparrow        | <i>Passer montanus</i>             | LC | crop damage                                    | 114 |
| <b>North (temperate grassland)</b>               | Inner Mongolia | mammal | wolf                         | <i>Canis lupus</i>                 | LC | livestock, poultry damage                      | 115 |
| <b>Northwest (desert)</b>                        | Gansu          | mammal | snow leopard                 | <i>Panthera uncia</i>              | VU | livestock damage                               | 34  |
|                                                  | Gansu          | mammal | wolf                         | <i>Canis lupus</i>                 | LC | livestock damage                               | 34  |
|                                                  | Gansu          | mammal | Eurasian lynx                | <i>Lynx lynx</i>                   | LC | livestock damage                               | 34  |
|                                                  | Gansu          | mammal | brown bear                   | <i>Ursus arctos</i>                | LC | livestock damage                               | 34  |
| <b>Central (deciduous broad-leaved forest)</b>   | Shaanxi        | mammal | Golden takin                 | <i>Budorcas taxicolor bedfordi</i> | VU | human casualties, property damage              | 33  |
|                                                  | Shaanxi        | mammal | black bear                   | <i>Ursus thibetanus</i>            | VU | crop damage                                    | 33  |
|                                                  | Shaanxi        | mammal | Sumatran serow               | <i>Capricornis sumatraensis</i>    | Vu | crop damage                                    | 33  |
|                                                  | Shaanxi        | mammal | North China leopard          | <i>Panthera pardus japonensis</i>  | VU | livestock and poultry damage                   | 33  |
|                                                  | Shaanxi        | mammal | rhesus macaque               | <i>Macaca mulatta</i>              | LC | crop damage                                    | 33  |
|                                                  | Shaanxi        | mammal | wild boar                    | <i>Sus scrofa</i>                  | LC | crop damage                                    | 33  |
|                                                  | Shaanxi        | mammal | tolai hare                   | <i>Lepus tolai</i>                 | LC | crop damage                                    | 33  |
|                                                  | Shaanxi        | mammal | Reeves's muntjac             | <i>Muntiacus reevesi</i>           | LC | crop damage                                    | 33  |
|                                                  | Shaanxi        | mammal | hog badger                   | <i>Arctonyx collaris</i>           | VU | crop damage                                    | 33  |
|                                                  | Shaanxi        | bird   | Crested ibis                 | <i>Nipponia nippon</i>             | EN | crop damage                                    | 33  |
|                                                  | Shaanxi        | bird   | Eagle owl                    | <i>Ninox scutulata</i>             | LC | poultry damage                                 | 33  |
| <b>Southeast (evergreen broad-leaved forest)</b> | Guizhou        | mammal | black bear                   | <i>Ursus thibetanus</i>            | VU | human casualties, crop damage                  | 117 |
|                                                  | Guizhou        | mammal | wild boar                    | <i>Sus scrofa</i>                  | LC | human casualties, crop damage                  | 117 |
|                                                  | Guizhou        | mammal | rhesus macaque               | <i>Macaca mulatta</i>              | LC | human casualties, crop damage, property damage | 117 |
|                                                  | Guizhou        | mammal | leopard cat                  | <i>Prionailurus bengalensis</i>    | LC | livestock damage                               | 117 |
|                                                  | Guizhou        | mammal | Siberian weasel              | <i>Mustela sibirica</i>            | LC | poultry damage                                 | 117 |
|                                                  | Guizhou        | mammal | yellow-throated marten       | <i>Martes flavigula</i>            | LC | poultry damage                                 | 117 |

|                                             |          |        |                     |                                   |    |                                                |              |
|---------------------------------------------|----------|--------|---------------------|-----------------------------------|----|------------------------------------------------|--------------|
|                                             | Guizhou  | mammal | dhole or red dog    | <i>Cuon alpinus</i>               | EN | livestock damage                               | 117          |
|                                             | Guizhou  | mammal | François' langur    | <i>Trachypithecus francoisi</i>   | EN | property damage                                | 117          |
|                                             | Guizhou  | mammal | Reeves's muntjac    | <i>Muntiacus reevesi</i>          | LC | crop damage                                    | 117          |
|                                             | Guizhou  | bird   | falcon species      | <i>Falconidae spp.</i>            | -  | poultry damage                                 | 117          |
| <b>East (evergreen broad-leaved forest)</b> | Anhui    | mammal | wild boar           | <i>Sus scrofa</i>                 | LC | human casualties, crop damage                  | 118          |
| <b>North (temperate grassland)</b>          | Shanxi   | mammal | North China leopard | <i>Panthera pardus japonensis</i> | VU | livestock damage                               | 38, 119, 120 |
|                                             | Shanxi   | mammal | tolai hare          | <i>Lepus tolai</i>                | LC | sapling                                        | 119,120      |
|                                             | Shanxi   | mammal | wild boar           | <i>Sus scrofa</i>                 | LC | crop damage, sapling                           | 119, 120     |
|                                             | Shanxi   | mammal | rhesus macaque      | <i>Macaca mulatta</i>             | LC | crop damage, human casualties, property damage | 120          |
| <b>Northeast (coniferous forest)</b>        | Liaoning | bird   | Vega gull           | <i>Larus vegae</i>                | LC | fish                                           | 57           |
